# Supplementary material for: Integrated Management of the Cotton Charcoal Rot Disease Using Biological Agents and Chemical Pesticides
Source: MDPI journal article supplement (doi:10.3390/jof10040250), 2024-03-26
Supplement: s1 [file s1]

Article

# Integrated Management of the Cotton Charcoal Rot Disease Using Biological Agents and Chemical Pesticides

Ofir Degani <sup>1,2,\*</sup>, Assaf Chen <sup>2,3</sup>, Elhanan Dimant <sup>1</sup>, Asaf Gordani <sup>1,2</sup>, Tamir Malul <sup>1,2</sup> and Onn Rabinovitz <sup>1</sup>

<sup>1</sup> Plant Sciences Department, Migal—Galilee Research Institute, Tarshish 2, Kiryat Shmona 1101600, Israel; elhanand@migal.org.il (E.D.); asigordani1@gmail.com (A.G.); tamir1012011@gmail.com (T.M.); onnrab@gmail.com (O.R.)

<sup>2</sup> Faculty of Sciences, Tel-Hai College, Upper Galilee, Tel-Hai 1220800, Israel; assafc@migal.org.il

<sup>3</sup> Soil, Water and Environment Department, Migal—Galilee Research Institute, Tarshish 2, Kiryat Shmona 1101600, Israel

\* Correspondence: d-ofir@migal.org.il or ofird@telhai.ac.il; Tel.: +972-54-678-0114

## Supplementary Materials

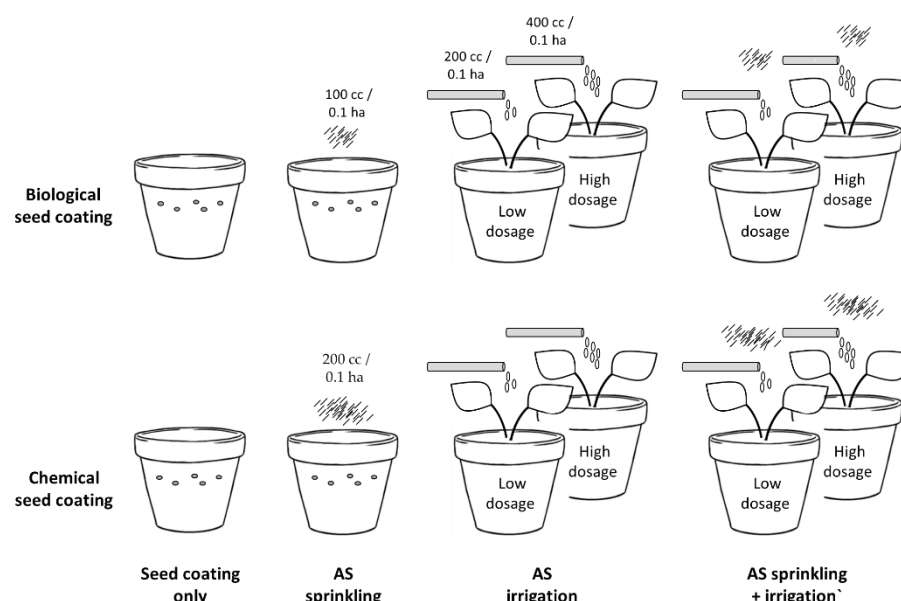

**Figure S1.** Experimental design of the pot assay showing the different treatments applied after sowing in substrate infected with *Macrophomina phaseolina*. Two types of seed coating were compared, biological (*Trichoderma* mix) or chemical (a mixture of thiram, captan, carboxin, and metalaxyl-M), solely or combined with the following five different applications of the fungicide Azoxystrobin (AS): by sprinkling at sowing, by irrigation (two dosages) on 10- and 21-day post sowing, or by sprinkling + irrigation. Healthy, non-infected control groups (which also had biological or chemical seed coating) were included. Every experimental group included seven biological replications, for a total of 98 pots.

**Table S1.** Meteorological data for the commercial field experiments <sup>1</sup>.

| Parameters                       | Value                 |
|----------------------------------|-----------------------|
| Dates                            | 09/04/2023–07/09/2023 |
| Temperature (2 m above soil, °C) | 24.2 ± 6.3            |
| Humidity (%)                     | 67.0 ± 30.8           |
| Radiation (W/m <sup>2</sup> )    | 294.4 ± 50.9          |
| Precipitation (mm)               | 81.8                  |

<sup>1</sup> Average data (± standard deviation) according to meteorological station Hulda 24 of The Land Conservation Division, Israel Ministry of Agriculture.

**Table S2.** The plants' growth parameters and survival rate after the different treatments in the pot assay on days 29 and 52 post-sowing, expressed as a percentage of healthy, non-infected controls. <sup>a</sup>

|                          |           | Day 29<br>(average / pot) |              |                  |                   |                 |                  | Day 52<br>(average / plant) |                  |                   |                 |                  |
|--------------------------|-----------|---------------------------|--------------|------------------|-------------------|-----------------|------------------|-----------------------------|------------------|-------------------|-----------------|------------------|
|                          | Treatment | Survival (%)              | Leaves (no.) | Root length (cm) | Shoot height (cm) | Root weight (g) | Shoot weight (g) | Leaves (no.)                | Root length (cm) | Shoot height (cm) | Root weight (g) | Shoot weight (g) |
| Chemical SC <sup>b</sup> | SC only   | 106%                      | 98%          | 111%             | 95%               | 97%             | 98%              | 116%                        | 102%             | 114%              | 122%            | 131%             |
|                          | Sp        | 103%                      | 102%         | 97%              | 89%               | 121%            | 101%             | 118%                        | 117%             | 114%              | 138%            | 145%             |
|                          | D200      | 100%                      | 93%          | 90%              | 105%              | 90%             | 93%              | 107%                        | 108%             | 113%              | 128%            | 118%             |
|                          | D400      | 103%                      | 83%          | 113%             | 91%               | 90%             | 78%              | 101%                        | 79%              | 122%              | 96%             | 103%             |
|                          | Sp + D200 | 91%                       | 65%          | 76%              | 68%               | 72%             | 51%              | 91%                         | 84%              | 95%               | 114%            | 91%              |
|                          | Sp + D400 | 100%                      | 84%          | 83%              | 80%               | 89%             | 70%              | 104%                        | 102%             | 116%              | 113%            | 101%             |
| Biological SC            | SC only   | 97%                       | 106%         | 94%              | 97%               | 94%             | 114%             | 110%                        | 110%             | 110%              | 137%            | 134%             |
|                          | Sp        | 91%                       | 95%          | 88%              | 87%               | 98%             | 91%              | 107%                        | 108%             | 109%              | 135%            | 133%             |
|                          | D200      | 94%                       | 95%          | 98%              | 92%               | 78%             | 91%              | 109%                        | 120%             | 116%              | 129%            | 122%             |
|                          | D400      | 94%                       | 84%          | 85%              | 94%               | 73%             | 78%              | 103%                        | 104%             | 118%              | 109%            | 102%             |
|                          | Sp + D200 | 91%                       | 85%          | 75%              | 95%               | 71%             | 85%              | 97%                         | 111%             | 112%              | 100%            | 105%             |
|                          | Sp + D400 | 99%                       | 82%          | 83%              | 91%               | 69%             | 84%              | 106%                        | 109%             | 120%              | 117%            | 112%             |

<sup>a</sup> The treatments were performed once with chemical seed coating (Chemical SC) and once with bio-coating (*Trichoderma* species mix, Biological SC). The treatments are seed coating solely (SC only), seed coating with Azoxystrobin sprinkling (Sp) or irrigation at low (D200) or high (D400) dosage, and a combination of the three (Sp + D200 and Sp + D400). The best and the least influential treatments in controlling the CRD fungus, *Macrophomina phaseolina*, are highlighted in green and pink, respectively. <sup>b</sup> SC – seed coating.

**Table S3.** *Macrophomina phaseolina* DNA in the plants' root after the different treatments in the pot assay on days 29 and 52 post-sowing, expressed as a percentage of healthy, non-infected controls. <sup>a</sup>

|                          |           | Day 29 | Day 52 |
|--------------------------|-----------|--------|--------|
| Chemical SC <sup>b</sup> | SC only   | 100%   | 100%   |
|                          | Sp        | 38%    | 49%    |
|                          | D200      | 39%    | 23%    |
|                          | D400      | 116%   | 25%    |
|                          | Sp + D200 | 144%   | 127%   |
|                          | Sp + D400 | 280%   | 66%    |
| Biological SC            | SC only   | 81%    | 55%    |
|                          | Sp        | 49%    | 35%    |
|                          | D200      | 42%    | 22%    |
|                          | D400      | 49%    | 160%   |
|                          | Sp + D200 | 107%   | 111%   |
|                          | Sp + D400 | 163%   | 263%   |

<sup>a</sup> The treatments were performed once with chemical seed coating (Chemical SC) and once with bio-coating (*Trichoderma* species mix, Biological SC). The treatments are seed coating solely (SC only), seed coating with Azoxystrobin sprinkling (Sp) or irrigation at low (D200) or high (D400) dosage, and a combination of the three (Sp + D200 and Sp + D400). The best and the least influential treatments in controlling the CRD fungus, *M. phaseolina*, are highlighted in green and pink, respectively.

<sup>b</sup> SC – seed coating.

**Table S4.** Assessment of the yield, symptoms, and *Macrophomina phaseolina* DNA in the plants' roots after the different treatments in the field trial, expressed as a percentage of the control – chemically (Captan) coated seeds plants. <sup>a</sup>

|                          |           | Yield   | Symptoms | qPCR   |         |
|--------------------------|-----------|---------|----------|--------|---------|
| Treatment                |           | Day 210 | Day 151  | Day 74 | Day 151 |
| Chemical SC <sup>b</sup> | SC only   | 100%    | 100%     | 100%   | 100%    |
|                          | Sp        | 105%    | 116%     | 166%   | 84%     |
|                          | D200      | 101%    | 156%     | 140%   | 115%    |
|                          | D400      | 113%    | 115%     | 142%   | 63%     |
|                          | Sp + D200 | 101%    | 148%     | 131%   | 123%    |
|                          | Sp + D400 | 109%    | 94%      | 117%   | 216%    |
| Biological SC            | SC only   | 117%    | 94%      | 128%   | 78%     |
|                          | Sp        | 102%    | 73%      | 99%    | 93%     |
|                          | D200      | 104%    | 127%     | 122%   | 97%     |
|                          | D400      | 116%    | 94%      | 207%   | 201%    |
|                          | Sp + D200 | 98%     | 126%     | 135%   | 127%    |
|                          | Sp + D400 | 112%    | 99%      | 83%    | 63%     |

<sup>a</sup> The treatments were performed once with chemical seed coating (Chemical SC) and once with bio-coating (*Trichoderma* species mix, Biological SC). The treatments are seed coating solely (SC only), seed coating with Azoxystrobin sprinkling (Sp) or irrigation at low (D200) or high (D400) dosage, and a combination of the three (Sp + D200 and Sp + D400). The best and the least influential treatments in controlling the CRD fungus, *M. phaseolina*, are highlighted in green and pink, respectively.

<sup>b</sup> SC – seed coating.
